# Supplementary material for: HIV and Hepatitis B and C incidence rates in US correctional populations and high risk groups: a systematic review and meta-analysis
Source: BMC Public Health. 2010 Dec 21;10:777. doi: 10.1186/1471-2458-10-777 (PMC3016391; doi:10.1186/1471-2458-10-777)
Supplement: Additional file 2 — "HIV, HBV and HCV studies by infection and risk group". [file 1471-2458-10-777-S2.XLS]

## Sheet: Sheet 1
Additional file 2: HIV, HBV and HCV Studies by Infection and Risk Group
Reference	Infection	Risk Group	Data Collection Start Year	New Case Criteria	State	Baseline Prevalence	Attrition (%)	Male (%)	Predominant Race (%)	mean age (yrs)	N	Other Risk (%)
Horsburgh, 1990[59]	HIV	CIIP	1985	EIA; WB	NV	2.4	n/a	93.7	white (58.1)	30	1069	n/a
Macalino, 2004[60]	HIV	CIIP	1998	ELISA; WB; PCR on baseline specimens of seroconverters	RI	1.8	24	100	white (57.7)	n/a	446	ivdu (11.2), msm (n/a)
Gellert, 1993[61]	HIV	IRAR	1985	ELISA; WB; IFA	CA	2.7	n/a	0	white (40.4)	n/a	865	n/a
Rich, 1999[62]	HIV	IRAR	1992	ELISA;WB	RI	3.3	0	0	white (63.7)	30	1081	ivdu (59.1), msm (0.0)
Monterroso, 2000[58]	HIV	IRAR	1994	ELISA;WB	CT	6	n/a	0	white (42.0%)	30.5	104	ivdu (100.0), msm (0.0)
Javanbakht, 2009[34]	HIV	IRAR	2000	n/a	CA	13.4	n/a	100	african american (37.0)	35	1737	msm (100.0), ivdu (n/a)
Friedman, 1995[64]	HIV	IVDU-S	1988	ELISA;WB	5 US cities	n/a	n/a	73	latino (33.0)	32	1680	msm (1.7)
Friedman, 1995[64]	HIV	IVDU-S	1988	ELISA;WB	10 US cities	n/a	n/a	77	african american (41.0)	35	5202	msm (2.4)
Weibel, 1996[65]	HIV	IVDU-S	1988	ELISA;WB	IL	24.6	12.3	75.2	african american (51.2)	39	562	n/a
Mehta, 2006[66]	HIV	IVDU-S	1988	ELISA;WB	MD	n/a	n/a	76	african american (91.0)	27	1983	msm (9.0)
Metzger, 1993[67]	HIV	IVDU-S	1989	ELISA;WB	PA	15.5	14.6	85	african american (78.0)	38	88	n/a
Nelson, 1994[68]	HIV	IVDU-S	1992	ELISA;WB	MD	24.1*	n/a	81.1	african american (93.3)	n/a	671	n/a
Fisher, 1998[69]	HIV	IVDU-S	1992	ELISA;WB	8 States	19.3	41.6	69.4	african american (55.0)	37.2	n/a	msm (1.4)
Fisher, 1998[69]	HIV	IVDU-S	1992	ELISA;WB	9 States	4.2	52.4	69.9	african american (54.1)	36.6	n/a	msm (0.9)
Monterroso, 2000[58]	HIV	IVDU-S	1994	ELISA;WB	MD	14	n/a	n/a	n/a	n/a	152	n/a
Monterroso, 2000[58]	HIV	IVDU-S	1994	ELISA;WB	IL	18	n/a	65.6	african american (43.3)	37	460	msm (15.3)
Monterroso, 2000[58]	HIV	IVDU-S	1994	ELISA;WB	NY	30	n/a	n/a	n/a	n/a	250	n/a
Monterroso, 2000[58]	HIV	IVDU-S	1994	ELISA;WB	NY	24	n/a	n/a	n/a	n/a	175	n/a
Des jarlais, 2003[70]	HIV	IVDU-S	1997	ELISA;WB	NY	2.9	n/a	68.8	white (77.3)	23.1	90	msm (5.5)
Des jarlais, 2003[70]	HIV	IVDU-S	1997	ELISA;WB	NY	9.3	n/a	70.5	hispanic (74.9)	25.4	92	msm (5.3)
Deren, 2004[71]	HIV	IVDU-S	1998	n/a	NY	28	21	74	puerto rican (100)	37.9	455	msm (9.0)
Deren, 2004[71]	HIV	IVDU-S	1998	n/a	PR	21	16	79	puerto rican (100)	32.5	268	msm (7.0)
Williams, 1992[63]	HIV	IVDU-T	1982	EIA; IBA	CT	n/a	56.6	63	white (83.0)	35	98	msm (0.0)
Moss, 1994[72]	HIV	IVDU-T	1985	ELISA;WB	CA	11	67.4	58	white (52.0)	n/a	681	n/a
Chitwood, 1999[73]	HIV	IVDU-T	1987	ELISA;WB	FL	16.3	9.6	65.1	white (65.9)	n/a	455	n/a
Metzger, 1993[67]	HIV	IVDU-T	1989	ELISA;WB	PA	9.9	3.9	69	african american (59.0)	40	146	n/a
Siddiqui, 1993[74]	HIV	IVDU-T	1990	EIA;WB	NY	41.9	24.7	62	african american (68.1)	n/a	177	n/a
Murrill, 2001[75]	HIV	IVDU-T	1994	EIA;WB; IFA	NY	n/a	n/a	n/a	non-white (63.9)		890	n/a
Murrill, 2001[75]	HIV	IVDU-T	1994	EIA;WB; IFA	NJ	n/a	n/a	n/a	non-white (77.5)	35	521	n/a
Murrill, 2001[75]	HIV	IVDU-T	1994	EIA;WB; IFA	WA	n/a	n/a	n/a	white (71.7)		1256	n/a
Murrill, 2001[75]	HIV	IVDU-T	1994	EIA;WB; IFA	CA	n/a	n/a	n/a	n/a		733	n/a
Mcfarland, 2000[76]	HIV	IVDU-T	1995	EIA; WB	CA	4.7	33.9	62.6	non-white (34.4)	n/a	220	msm (3.5)
Kingsley, 1991[77]	HIV	MSM	1984	n/a	MD	n/a	n/a	100	n/a	n/a	n/a	n/a
Kingsley, 1991[77]	HIV	MSM	1984	n/a	IL	n/a	n/a	100	n/a	n/a	n/a	n/a
Kingsley, 1991[77]	HIV	MSM	1984	n/a	CA	n/a	n/a	100	n/a	n/a	n/a	n/a
Kingsley, 1991[77]	HIV	MSM	1984	n/a	PA	n/a	n/a	100	n/a	n/a	n/a	n/a
Buchbinder, 1996[78]	HIV	MSM	1993	EIA;WB; IFA	IL	n/a	6.5	100	white (84.0)	33	624	ivdu (0.4)
Buchbinder, 1996[78]	HIV	MSM	1993	EIA;WB; IFA	CO	n/a	10.2	100	white (81.0)	34.4	689	ivdu (3.0)
Buchbinder, 1996[78]	HIV	MSM	1993	EIA;WB; IFA	CA	n/a	12.3	100	white (70.0)	30.6	662	ivdu (4.0)
Koblin, 1996[79]	HIV	MSM	1993	ELISA;WB	NY	6.1	12.4	100	white (73.2)	32	545	ivdu (3.1)
Tabet, 1998[80]	HIV	MSM	1995	n/a	WA	n/a	9.5	100	white (85.8)	32	523	n/a
Buchbinder, 2005[81]	HIV	MSM	1995	n/a	MA	n/a	n/a	100	white (85.8)	33.7	745	ivdu (0.0)
Buchbinder, 2005[81]	HIV	MSM	1995	n/a	NY	n/a	n/a	100	white (68.0)	31.8	551	ivdu (2.3)
Buchbinder, 2005[81]	HIV	MSM	1995	n/a	CA	n/a	n/a	100	white (59.8)	31.6	573	ivdu (2.5)
Buchbinder, 2005[81]	HIV	MSM	1995	n/a	CO	n/a	n/a	100	white (78.6)	35.2	312	ivdu (1.6)
Buchbinder, 2005[81]	HIV	MSM	1995	n/a	IL	n/a	n/a	100	white (78.5)	35	264	ivdu (0.34)
Buchbinder, 2005[81]	HIV	MSM	1995	n/a	WA	n/a	n/a	100	white (85.7)	33.5	635	ivdu (2.4)
Koblin, 2006[82]	HIV	MSM	1999	ELISA; IFA; WB	MA	n/a	0	100	white (80.9)	34.9	729	msm (5.9)
Koblin, 2006[82]	HIV	MSM	1999	ELISA; IFA; WB	IL	n/a	0	100	white (74.8)	33.5	624	msm (6.4)
Koblin, 2006[82]	HIV	MSM	1999	ELISA; IFA; WB	CO	n/a	0	100	'white (77.6)	35.1	726	msm (14.4)
Koblin, 2006[82]	HIV	MSM	1999	ELISA; IFA; WB	NY	n/a	0	100	'white (53.6)	31.7	737	msm (13.6)
Koblin, 2006[82]	HIV	MSM	1999	ELISA; IFA; WB	CA	n/a	0	100	white (68.6)	35.3	736	msm (9.7)
Koblin, 2006[82]	HIV	MSM	1999	ELISA; IFA; WB	WA	n/a	0	100	white (79.7)	33.5	743	msm (10.9)
Vlahov, 1993[83]	HCV	CIIP	1985	ELISA; HCV-RIBA	MD	38.1	0	100	african american (63.9)	25	164	n/a
Macalino, 2004[60]	HCV	CIIP	1998	ELISA; PCR on baseline specimens of seroconverters	RI	23.1	24	100	white (57.4)	n/a	446	ivdu (11.7), msm (n/a)
Garfein, 1998[84]	HCV	IVDU-S/T	1994	EIA-2	MD	37.6	26.6	45.8	african american (78.6)	23.5	105	msm (n/a)
Hagan, 2004[85]	HCV	IVDU-S/T	1994	ELISA-2; HCV-RIBA for samples positive with a low signal-to-cut off ratio	WA	77.2	42	62	white (76.0)	n/a	484	msm (17.8)
Villano, 1997[86]	HCV	IVDU-S	1988	RT-PCR; EIA-2 for negative specimens; RIBA for EIA-2(+) and RT-PCR(-) specimens	MD	91.1	27	76	african american (91.0)	35	142	msm (9.0)
Thorpe, 2002[87]	HCV	IVDU-S	1997	EIA-2; RIBA; PCR for indeterminate results	IL	27	31	67.3	white (65.7)	24	353	msm (n/a)
Des jarlais, 2003[70]	HCV	IVDU-S	1997	EIA	NY	40.2	n/a	68.8	white (77.3)	23.1	90	msm (5.5)
Des jarlais, 2003[70]	HCV	IVDU-S	1997	EIA	NY	51	n/a	70.5	hispanic (74.9)	25.4	92	msm (5.3)
Hahn, 2002[88]	HCV	IVDU-S	2000	EIA-2; EIA-3	CA	39.2	58.7	64	white (80.0)	22	195	msm (19.2)
Fuller, 2004[89]	HCV	IVDU-S	2000	ELISA;RIBA	NY	56.1	45.6	n/a	n/a	n/a	62	msm (27.3)
Macalino, 2004[60]	HBV	CIIP	1998	EIA (anti-HBc, HBsAg); PCR on baseline specimens of seroconverters	RI	20.2	24	100	white (57.4)	n/a	446	ivdu (11.5), msm (n/a)
Khan, 2005[33]	HBV	CIIP	2000	EIA (total anti-HBc and HBsAg, or IgM anti-HBc, or anti-HBs)	GA	20.5	23	100	african american (66.3)	32.5	503	msm (4.5), ivdu (2.9)
Levine, 1996[90]	HBV	IVDU-S	1988	EIA (HBsAg, anti-HBs, and anti-HBc)	MD	81.4	44.3	78.8	african american (86.2)	35	240	msm (7.0)
Des jarlais, 2003[70]	HBV	IVDU-S	1997	EIA (anti-HBc )	NY	21.7	72.8	68.8	white (77.3)	23.1	90	msm (5.5)
Des jarlais, 2003[70]	HBV	IVDU-S	1997	EIA (anti-HBc )	NY	31.7	34.7	70.5	hispanic (74.9)	25.4	92	msm (5.3)
Hagan, 1999[91]	HBV	IVDU-S/T	1994	EIA (anti-HBc)	WA	68.3	27.6	60.9	white (74.8)	n/a	460	msm (12.2)
CIIP = continuously incarcerated inmate population. IRAR = inmates released and reincarcerated. IVDU-S = intravenous drug users recruited through street outreach. IVDU-T = intravenous drug users recruited
from drug treatment programs or clinics. IVDU-S/T = intravenous drug users recruited through either street outreach or from drug treatment programs or clinics. MSM = men who have sex with men. EIA = enzyme
immunoassay. EIA-2 = second generation enzyme immunoasay. EIA-3 = third generation enzyme immunoassay. ELISA = enzyme linked immunosorbent assay. IBA = immuno-blot analysis. IFA = immunoflouresence
assay. PCR = polymerase chain reaction. RIBA = recombinant immunoblot assay. WB = western blot. MSM = men who have sex with men. IVDU = intravenous drug user. *The baseline prevalence among intravenous
drug users screened in the original ALIVE cohort enrolled between Feb 1988 and Mar 1989 was used.
